## ***Riemerella anatipestifer* M949\_0459 gene is responsible for the bacterial resistance to tigecycline**

**Tao Li<sup>1</sup>, Min Shan<sup>1,2</sup>, Jing He<sup>1</sup>, Xiaolan Wang<sup>1</sup>, Shaohui Wang<sup>1</sup>, Mingxing Tian<sup>1</sup>, Jingjing Qi<sup>1</sup>, Tingrong Luo<sup>2</sup>, Yonghong Shi<sup>1</sup>, Chan Ding<sup>1</sup> and Shengqing Yu<sup>1</sup>**

<sup>1</sup> Shanghai Veterinary Research Institute, Chinese Academy of Agricultural Sciences, Shanghai, China

<sup>2</sup> College of Animal Science and Technology, Guangxi University, Guangxi, China

**Correspondence to:** Shengqing Yu, **email:** yus@shvri.ac.cn

**Keywords:** *Riemerella anatipestifer*, M949\_0459 gene, MIC, tigecycline, resistance, Pathology Section

**Received:** May 16, 2017

**Accepted:** June 29, 2017

**Published:** July 27, 2017

**Copyright:** Li et al. This is an open-access article distributed under the terms of the Creative Commons Attribution License 3.0 (CC BY 3.0), which permits unrestricted use, distribution, and reproduction in any medium, provided the original author and source are credited.

### **ABSTRACT**

**Based on its important role in last-line therapeutics against multidrug-resistant bacteria, tigecycline has been increasingly important in treating infections. However, mounting reports on tigecycline-resistant bacterial strains isolated from different sources are of concern, and molecular mechanisms regarding tigecycline resistance are poorly understood. *Riemerella anatipestifer* is a Gram-negative, non-motile, non-spore-forming, rod-shaped bacterium, which causes fibrinous pericarditis, perihepatitis, and meningitis in infected ducks. We previously constructed a random transposon mutant library using *Riemerella anatipestifer* strain CH3, in present study, we described that *Riemerella anatipestifer* M949\_0459 gene is responsible for the bacterial resistance to tigecycline. Using the minimum inhibitory concentration assay, a mutant strain showed significantly increased (about six-fold) tigecycline susceptibility. Subsequently, the knocked-down gene was identified as M949\_0459, a putative flavin adenine dinucleotide-dependent oxidoreductase. To confirm the resistance function, M949\_0459 gene was overexpressed in *Escherichia coli* strain BL21, and the minimum inhibitory concentration analysis showed that the gene product conferred resistance to tigecycline. Additionally, expression of the M949\_0459 gene under treatment with tigecycline was measured with quantitative real-time PCR. Results showed that the mRNA expression of M949\_0459 gene was elevated under tigecycline treatment with dose range of 1-10 mg/L, and peaked at 4 mg/L. Moreover, two kinds of efflux pump inhibitors, carbonyl cyanide m-chlorophenyl hydrazone and phenylalanine arginyl  $\beta$ -naphthylamide were tested, which showed no function on tigecycline resistance in the strain CH3. Our results may provide insights into molecular mechanisms for chemotherapy in combating *Riemerella anatipestifer* infections.**

### **INTRODUCTION**

Tigecycline, one member of the tetracyclines group called glycylcyclines, is a semisynthetic antibiotic with an expanded broad spectrum of potent activity against most of the clinically important bacterial pathogens, including many multidrug-resistant bacteria [1, 2]. As a tetracycline analog, a change in structure of an additional N-N dimethylglycylamido (DMG) group at the C<sub>9</sub> position of the D ring of minocycline enhances the binding ability of

tigecycline to its ribosomal target site and eludes common tetracycline resistance mechanisms [3]. Once, tigecycline was considered to be a last-chance antibiotic against multi-drug resistant bacteria. Since 2007, tigecycline has been suggested by the Food and Drug Administration for the treatment of complicated intra-abdominal infections, skin infections, and community-acquired pneumonia. Unfortunately, the widespread use of tigecycline has led to bacterial resistance. So far, the mechanisms of tigecycline resistance have mainly been investigated in

*Klebsiella pneumoniae*, *Escherichia coli*, and *Acinetobacter baumannii* [4-7].

*Riemerella anatipestifer* (*R. anatipestifer*), a member of the *Flavobacteriaceae* family of the rRNA superfamily V [8], infects young ducks and geese, causing a severe form of Riemerellosis containing fibrinous pericarditis, perihepatitis, and meningitis. Riemerellosis is one of the most detrimental and lethal enteric diseases and is a major animal welfare and economic problem for the poultry industry. Because repeated infectious episodes are possible, eradication is difficult in duck flocks. Despite advances in novel vaccines, Riemerellosis has mainly been controlled by chemotherapy. Quinolones, tetracyclines, and cephalosporins are widely used for controlling *R. anatipestifer* infection in the avian breeding industry, and consequently have led to the emergence of antibiotic-resistant strains. Recently, some classes of drug resistance genes have been identified in *R. anatipestifer*, including aminoglycoside resistance genes (*ant*, *aac*, and *aph*), a chloramphenicol resistance gene (*cat*), and a chloramphenicol and florfenicol resistance gene (*floR*) [9-13].

Most studies of tigecycline focus on the bacteria found in humans, however, in many countries and areas, the variety of antibiotics used in the poultry industry is more than used in human medicine. In particular, in the avian breeding industry, the tigecycline analog tetracycline is commonly used and has resulted in increasing antibiotic drug resistance [14, 15]. To date, tigecycline-resistance mechanisms in bacteria in the *Flavobacteriaceae* family have not been studied. In our previous study, we constructed a random transposon insertion library using the *R. anatipestifer* strain CH3 [16]. In this work, using the minimum inhibitory concentration (MIC) assay of tigecycline, we obtained a mutant strain which showed a significantly increased (about six-fold) tigecycline susceptibility compared with the wild-type strain CH3. To clarify whether the increased tigecycline susceptibility is associated with the knocked-down gene, the mutant strain and the inactivated gene were characterized. Our

results indicate that *R. anatipestifer* *M949\_0459* gene is responsible for the bacterial resistance to tigecycline.

## RESULTS

### Identification of the mutant showing increased tigecycline susceptibility

In our previous work, about 2, 520 random transposon mutants were obtained [16], as mentioned above, using the tigecycline MIC assay, a mutant strain showed significantly increased (six-fold) tigecycline susceptibility (Table 2). With genome walking, the transposon-inserted gene was identified to be *M949\_0459*, which encodes a putative flavin adenine dinucleotide (FAD)-dependent oxidoreductase of 386 amino acids, the mutant was named as CH3Δ*M949\_0459*. The insertion of the transposon was located at nucleotide 112 of the gene (Figure 1). In addition, the effect of the *M949\_0459* gene deletion on expression of the genes in the flanking regions was investigated using qRT-PCR. As shown in Figure 2, the *M949\_0459* gene deletion inactivated the expression of the mutated gene, however, it did not affect the expression of both upstream gene *M949\_0460*, which encodes the beta-lactamase class D protein, and the downstream gene *M949\_0458*, which encodes a cation efflux protein, indicating transposon insertion in the *M949\_0459* gene had no polar effect on its flanking gene expression. Moreover, a stability test of the mutant strain CH3Δ*M949\_0459* was performed based on the method of Fu and Tseng [20] with some modifications. The mutant strain CH3Δ*M949\_0459* was subcultured in a non-selective medium for more than 50 generations. Approximately 200 colonies were selected, and each colony was patched into TSA plates supplemented with or without erythromycin. No difference in growth was observed between the two types of plates.

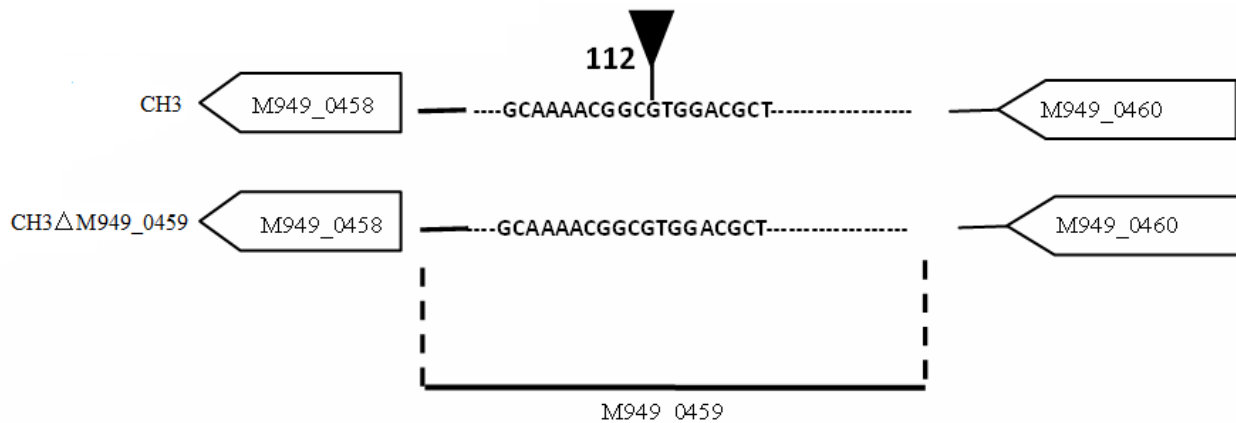

**Figure 1: Schematic of the transposon insertion site.** The tip of infundibulum indicates the transposon insertion site (112 bp).

**Table 1: Strains, plasmids, and primers used in this study**

| Strains, plasmids or primers | Description                                                                                                                              | References |
|------------------------------|------------------------------------------------------------------------------------------------------------------------------------------|------------|
| Strains                      |                                                                                                                                          |            |
| CH3                          | <i>Riemerella anatipestifer</i> wild-type strain (serotype 1)                                                                            | [49]       |
| CH3ΔM949_0459                | Mutant strain, derived from <i>Riemerella anatipestifer</i> CH3, in which the <i>M949_0459</i> gene was inactivated by Tn4351 insertion. | This study |
| plasmids                     |                                                                                                                                          |            |
| Pet-28a(+)                   | Kan <sup>r</sup> , Bacterial expression vector with T7 lac promoter                                                                      | [50]       |
| Pet-28a(+)-M949_0459         | Kan <sup>r</sup> , Bacterial expression vector with T7 lac promoter and the <i>M949_0459</i> gene insertion                              | This study |
| Primers                      |                                                                                                                                          |            |
| RA 16S rRNA                  | 5'-GAGCGGTAGAGTATCTTCGGATACT-3'                                                                                                          | This study |
| RA 16S rRNA                  | 5'-AATTCCTTTGAGTTTCAACCTTGCG-3'                                                                                                          | This study |
| SP1                          | 5'-CTCCCAGAAAATTTCCAAGACTCTCA-3'                                                                                                         | This study |
| SP2                          | 5'-TAAAGTGCTGACCCGTAACGAAC-3'                                                                                                            | This study |
| SP3                          | 5'-GTGGTAGCTATAGCATGGAGCTTGC-3'                                                                                                          | This study |
| RTPCR-16SF                   | 5'-CAACCATGCAGCACCTTGAAAA -3'                                                                                                            | This study |
| RTPCR-16SR                   | 5'-GACGAAAGCGTGGGGAGCGAAC-3'                                                                                                             | This study |
| M949_0459 -F                 | 5'-ACAAAGACCGAGATGCCAGG -3'                                                                                                              | This study |
| M949_0459-R                  | 5'-GTCAAACCGATTTTCGGGCT -3'                                                                                                              | This study |
| M949_0458 -F                 | 5'-GCTGTTGGCGGAACAGTAGT-3'                                                                                                               | This study |
| M949_0458-R                  | 5'-GTCAGGCATTTTCTCGACTCC-3'                                                                                                              | This study |
| M949_0460 -F                 | 5'-AGGAATGGTTTTCGATACTTTGACG-3'                                                                                                          | This study |
| M949_0460 -R                 | 5'-CCAGCCTGATTCCCGTTCA-3'                                                                                                                | This study |

### Homologous gene and protein analyses.

Currently, 28 complete *R. anatipestifer* genomes have been submitted to NCBI, BLAST analysis indicated that the *M949\_0459* homologous sequence was observed

in 6 of them (21%), suggesting that the distribution of the homologous sequence is limited in partial *Riemerella* strains. By BLASTP and FASTA algorithms, the *M949\_0459* presents 100% identity with G148\_RS08775 and G148\_RS08830 (RA-CH-2), 99% identity with B739\_RS00155 (RA-CH-1), 95% identity with B739\_

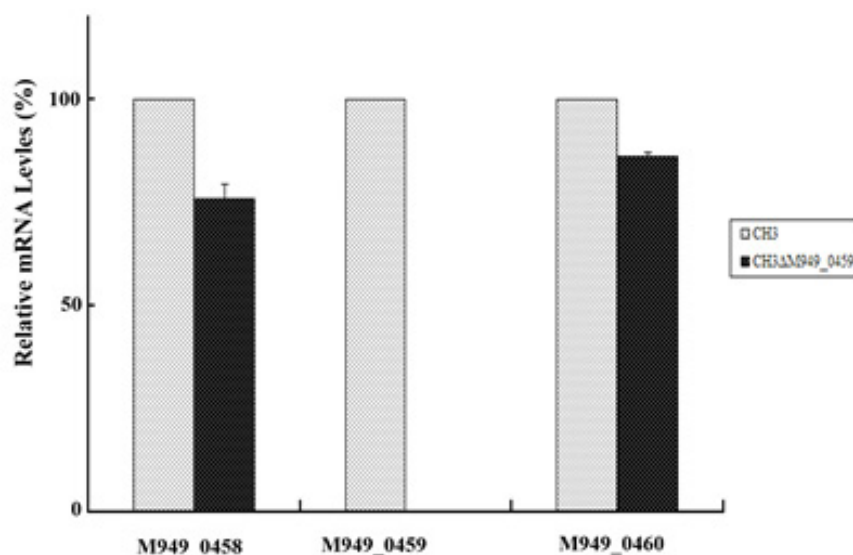

**Figure 2: The *M949\_0459* gene deletion did not affect expression of its flanking genes.** The expression of the *M949\_0459* and its flanking genes in the mutant strain CH3ΔM949\_0459 and wild-type strain CH3 was determined using quantitative real-time PCR analysis. The expression of *M949\_0459* gene was inactivated in the mutant strain CH3ΔM949\_0459, however, no significant difference was shown in expression of *M949\_0458* and *M949\_0460* genes between *R. anatipestifer* CH3 and CH3ΔM949\_0459. Error bars represent standard deviations from three replicates.

**Table 2: Determination of bacterial susceptibility to antibiotics**

| Strains       | Antibiotics     |     |     |     |     |     |     |     |
|---------------|-----------------|-----|-----|-----|-----|-----|-----|-----|
|               | TGC MICs (mg/L) | AMP | NOR | CHL | CRO | ERY | GEN | KAN |
| CH3           | 12.0            | S   | I   | R   | S   | S   | R   | R   |
| CH3ΔM949_0459 | 2.0             | S   | I   | R   | S   | R   | R   | R   |

Abbreviations: TGC, tigecycline; AMP, ampicillin; NOR, norfloxacin; CHL, chloromycetin; CRO, ceftriaxone; ERY, erythromycin; GEN, gentamicin; KAN, kanamycin. MIC, the minimum inhibitory concentration; S, susceptible; I, intermediate; R, resistant.

RS00130 (RA-CH-1), 94% identity with RIA\_RS01715 (RA-GD) and AS87\_09615 (Yb2), and 93% identity with RIA\_RS01735 (RA-GD). Multi-sequence alignment of the *M949\_0459* homologous genes from different sources and evolutionary relation of the *M949\_0459* homologous proteins from different sources were summarized in Figure 3. Furthermore, comparative analyses of the *M949\_0459* gene environment indicated that the upstream *M949\_0460* homologous gene was observed in 4 of the 5 genomes, and the downstream *M949\_0458* homologous gene was observed in 2 of the 5 genomes (Figure 4).

### Knock-down of the *M949\_0459* gene decreased bacterial metabolic activity

FAD-dependent oxidoreductase is a complex I NADH ubiquinone oxidoreductase that is crucial for transferring electrons into the respiratory chain in bacteria [21]. Mutations in FAD-dependent oxidoreductase may result in metabolic deficiencies. Based on the annotation of the *M949\_0459* as a putative FAD-dependent oxidoreductase in the GenBank, we tested the viability and metabolism of the bacteria using the alamarBlue assay. The results showed that the metabolic activity clearly decreased in the mutant strain CH3Δ*M949\_0459* compared with the wild-type strain CH3 (Figure 5).

### The *M949\_0459* gene conferred tigecycline resistance to transformed *E. coli* BL21

We measured the uptake of tigecycline by *E. coli* BL21 (DE3) which contained *M949\_0459* on a Pet28a(+) background. The results showed that *M949\_0459* conferred tigecycline resistance to *E. coli* BL21 (Table 3, Figure 6A) but did not affect susceptibility to other antibiotics including ampicillin, norfloxacin, ceftriaxone, gentamicin, kanamycin and imipenem. As mentioned above, sequence analysis of *M949\_0459* revealed that this gene shared 91% similarity to *TetX* (*Bacteroides fragilis* str. S23L17). In 1988, Speer and Salyers first identified the *TetX* gene from a *Bacteroides fragilis* strain [22]. Further research discovered that TetX is a flavin-dependent monooxygenase that adds a hydroxyl group to the antibiotic to inactivate tetracycline, and more

importantly, with the presence of tetracycline, introduction of the *tetX* gene into *E. coli* induced a color change from orange to brown in the growth media [23]. Additionally, some evidence has shown that tigecycline and tetracycline act in a similar manner by binding to the same site on the ribosome [24, 25], our studies have indicated that an oxygen-dependent color change was observed in the presence of tigecycline (Figure 6B).

### Tigecycline treatment changed expression of the *M949\_0459* gene in the bacteria at transcriptional level

By qRT-PCR, we quantitatively examined the expression of *M949\_0459* following treatment with different doses of tigecycline. We observed a non-linear effect of the tigecycline dose on the *M949\_0459* gene expression. The results showed that the mRNA expression of the *M949\_0459* gene was elevated under tigecycline treatment with dose range of 1-10 mg/L, and peaked at 4 mg/L (Figure 7).

### The efflux pump inhibitors (EPIs) played no roles on the tigecycline susceptibility

In contrast to destruction or covalent modification of other antibiotics such as  $\beta$ -lactams and aminoglycosides, efflux systems have been identified as the primary mechanism of tigecycline resistance in *Klebsiella pneumoniae*, *Proteus mirabilis*, and *E. coli* [26-28]. In this study, two kinds of EPIs, PA $\beta$ N and CCCP, were used to evaluate the role of the efflux pumps in tigecycline resistance in *R. anatipestifer* strain CH3. As shown in Table 4, the tigecycline susceptibility of *R. anatipestifer* strain CH3 and CH3Δ*M949\_0459* showed no difference with or without the EPIs, indicating the efflux pump inhibitors (EPIs) play no roles on the tigecycline susceptibility.

## DISCUSSION

As a glycylycylcine antimicrobial agent, tigecycline has been used for therapy in humans against a wide range of Gram-positive and Gram-negative anaerobic



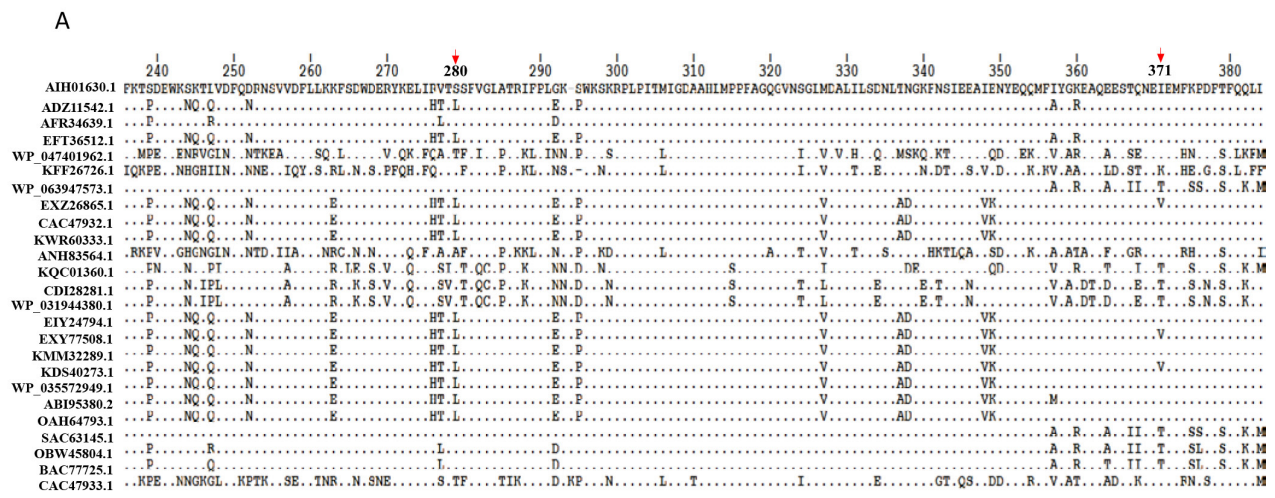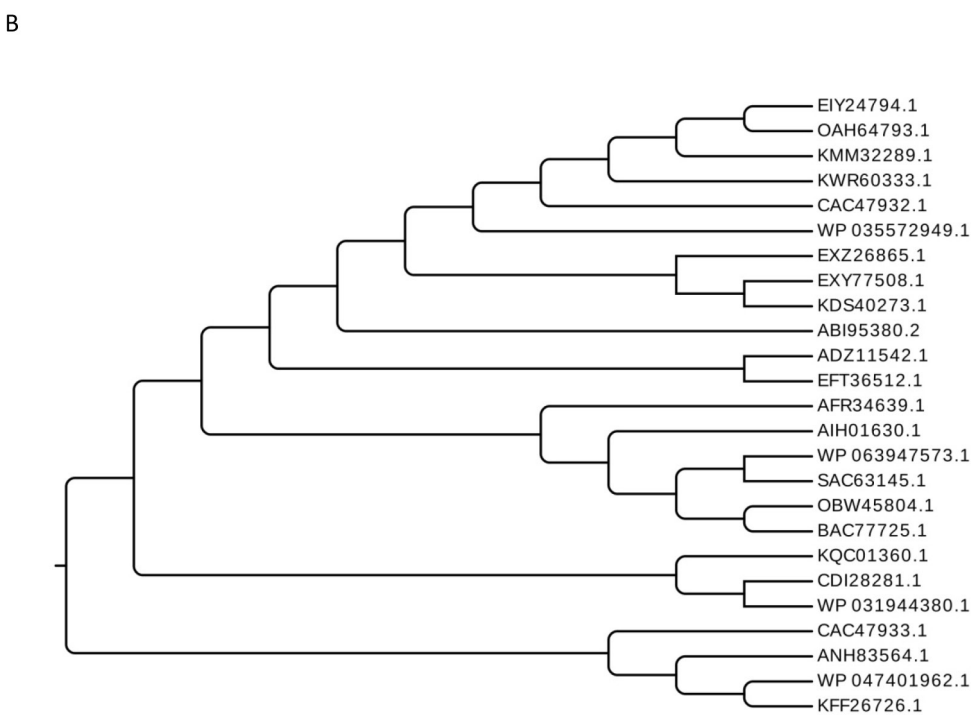

**Figure 3: Bioinformatics analysis.** **A.** Multi-sequence alignment of the M949\_0459 homologous proteins from different sources. The arrows indicate the locations of 280th and 371th amino acids. **B.** Evolutionary relation of the M949\_0459 homologous proteins from different sources. Twenty five representatives were selected for the multi-sequence alignment and evolutionary relation analysis, including AIH01630.1 FAD-dependent oxidoreductase (*R. anatipestifer* CH3), ADZ11542.1 FAD-dependent oxidoreductase (*R. anatipestifer* RA-GD), AFR34639.1 hypothetical protein B739\_0030 (*R. anatipestifer* RA-CH-1), EFT36512.1 monoxygenase, FAD-binding protein (*R. anatipestifer* RA-YM), WP\_047401962.1 tetracycline resistance protein (*Chryseobacterium* sp. YR460), KFF26726.1 tetracycline resistance protein (*Chryseobacterium piperi*), WP\_063947573.1 TetX family tetracycline inactivation enzyme (*Enterobacter cloacae*), EXZ26865.1 tetX2 protein (*Bacteroides fragilis* str. S36L11), CAC47932.1 TetX2 protein (*Bacteroides thetaiotaomicron*), KWR60333.1 kynurenine 3-monoxygenase (*Bacteroides ovatus*), ANH83564.1 tetracycline resistance protein (*Niabella ginsenosidivorans*), KQC01360.1 tetracycline resistance protein (*Pedobacter* sp. Hv1), CDI28281.1 FAD dependent oxidoreductase (*Acinetobacter pittii* 42F), WP\_031944380.1 TetX family tetracycline inactivation enzyme (*Acinetobacter calcoaceticus*), EIY24794.1 hypothetical protein HMPREF1064\_05159 (*Bacteroides dorei* CL02T12C06), EXY77508.1 tetX2 protein (*Bacteroides fragilis* str. 3988 T1), KMM32289.1 tetracycline resistance protein (*Parabacteroides goldsteinii*), KDS40273.1 tetX2 protein (*Bacteroides vulgatus* str. 3775 SRB19), WP\_035572949.1 TetX family tetracycline inactivation enzyme (*Elizabeth kingiaanophelis*), ABI95380.2 tetracycline resistance protein (*Sphingobacterium* sp. PM2-P1-29), OAH64793.1 tetracycline resistance protein (*Chryseobacterium* sp. J200), SAC63145.1 Kynurenine 3-monoxygenase (*Enterobacter cloacae*), OBW45804.1 Kynurenine 3-monoxygenase (*Chryseobacterium* sp. BGARF1), BAC77725.1 tetracycline inactivating enzyme (*Pseudomonas aeruginosa*), and CAC47933.1 TetX1 protein (*Bacteroides thetaiotaomicron*), respectively. The multi-sequence alignments were performed using CLUSTAL Omega.

**Table 3: Determination of the tigecycline susceptibility of *E. coli* BL21 transformed with Pet-28a (+)-M949\_0459**

| Strains              | Antibiotics     |     |     |     |     |     |     |
|----------------------|-----------------|-----|-----|-----|-----|-----|-----|
|                      | TGC MICs (mg/L) | AMP | NOR | CRO | GEN | KAN | IPM |
| Pet28a(+)-DE3        | 0.25            | S   | S   | S   | S   | R   | S   |
| Pet-28a(+)-M949_0459 | 1.00            | S   | S   | S   | S   | R   | S   |

Abbreviations: TGC, tigecycline; AMP, ampicillin; NOR, norfloxacin; CRO, ceftriaxone; GEN, gentamicin; KAN, kanamycin; IPM, imipenem; MIC, the minimum inhibitory concentration; S, susceptible; R, resistant.

and aerobic bacteria and cell-wall free *mycoplasmas*, *chlamydiae*, and *mycobacterium* [29]. Although there have been no reports on the use of tigecycline against bacteria unique to a food animal, however, the first identified bacteria carrying special plasmids and antibiotic resistance genes were found in humans, which could make their way into food animal bacteria and vice versa. In many countries and areas, the total amount of antibiotics used in the poultry industry is more than the amount used in human

medicine and is thus an important element in exposing bacteria to antibiotics [30-32]. In particular, in the avian breeding industry, the tigecycline analog tetracycline is commonly used and has resulted in increasing antibiotic drug resistance [33]. At present, increasing numbers of reports on tigecycline-resistant bacterial strains isolated from human sources are of concern, yet the molecular mechanisms regarding tigecycline resistance are poorly understood.

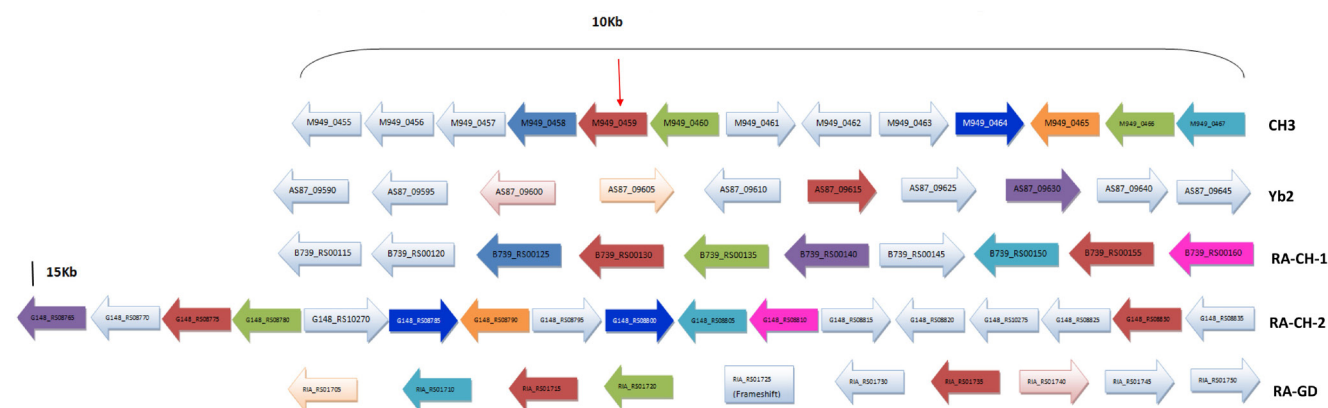

**Figure 4: Gene environment around the *M949\_0459* and its homology genes in *Riemerella* genomes.** The arrow indicates the *M949\_0459* gene. The same color indicates the homology gene.

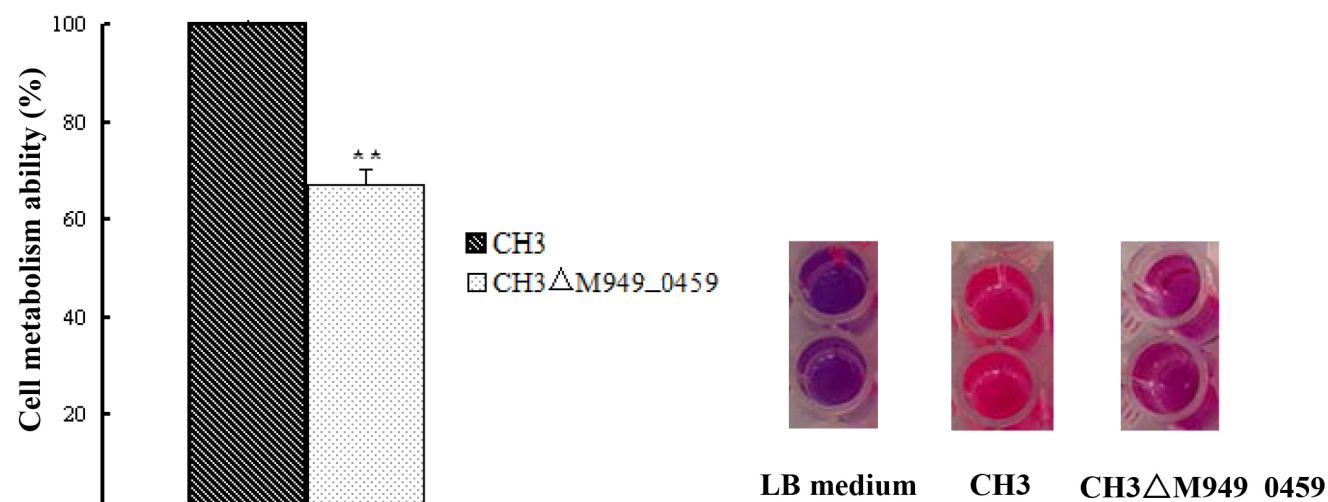

**Figure 5: Knock-down of the *M949\_0459* gene decreased bacterial metabolic activity.** The metabolic activity of the strains was measured using the alamarBlue reagent. \*\* $p < 0.01$ .

**Table 4: Effects of efflux pump inhibitors on tigecycline susceptibility**

| Strains       | TGC MICs (mg/L) |                         |
|---------------|-----------------|-------------------------|
|               | Without EPIs    | With inhibition of EPIs |
| CH3           | 12.0            | 12.0                    |
| CH3ΔM949_0459 | 2.0             | 2.0                     |

Abbreviations: TGC, tigecycline; MIC, the minimum inhibitory concentration; EPIs, efflux pump inhibitors, including carbonyl cyanide m-chlorophenyl hydrazone (3 mg/L) and phenylalanine arginyl β-naphthylamide (40 mg/L).

*R. anatipestifer* is ubiquitous in the environment, and has been isolated from ducks, turkeys, chickens, and other birds [9, 34]. In farmed ducks, *R. anatipestifer* infection leads to high mortality and consequently to great economic losses. Currently, a variety of approaches have been applied to control *R. anatipestifer* infections, but the most widely used strategy is chemotherapeutic agents in

commercial poultry flocks, despite rising drug resistance. To date, several antibiotic resistance genes have been reported in *R. anatipestifer* [10, 11]. Using the tigecycline MIC assay, the *M949\_0459* gene-deficient *R. anatipestifer* mutant strain CH3ΔM949\_0459 had significantly increased tigecycline susceptibility compared with the wild-type strain CH3. Sequencing analysis revealed that

A

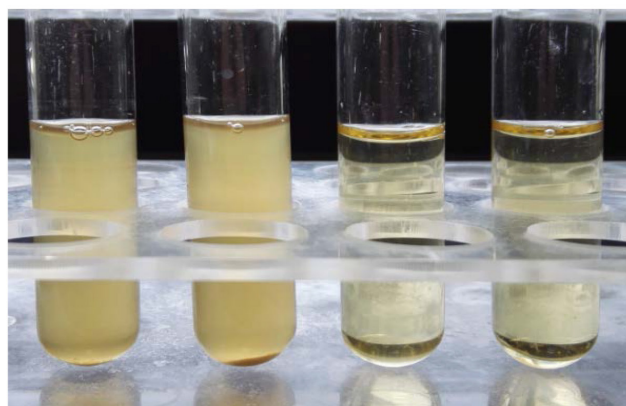

FAD- Pet28a(+)-M949\_0459  
(0.5 mg/L TGC)

Pet28a (+)-DE3  
(0.5mg/L TGC)

B

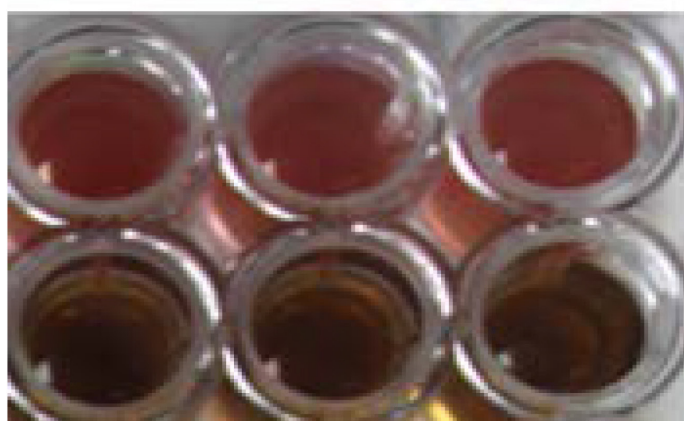

CH3

CH3 (10 mg/L TGC)

**Figure 6: Determination of the tigecycline susceptibility of *E. coli* BL21 transformed with Pet-28a(+)-M949\_0459.** A. The transformants containing the *M949\_0459* gene showed higher tigecycline resistance compared to controls. B. An oxygen-dependent color change was observed in the presence of high doses of tigecycline.

the *M949\_0459* gene encodes a putative FAD-dependent oxidoreductase. To confirm that the *M949\_0459* is the resistance gene for tigecycline, *M949\_0459* on a Pet28a(+) background was transformed into *E. coli* BL21 (DE3). As we had hypothesized, the expression of the recombinant protein conferred tigecycline resistance to *E. coli* BL21 (DE3) cells. Previous studies about the FAD-dependent oxidoreductase related to the resistance to the tigecycline analog tetracycline had demonstrated that the resistance mechanism of tetracycline was identified with detoxification of tetracycline, and resulted in a change in the color of the medium from yellow to gray-black [35]. In our current work, we showed a similar phenomenon in the *E. coli* BL21 (DE3) expressing *M949\_0459*.

Although it is known that FAD-dependent oxidoreductase can alter tigecycline to 11a-hydroxytigecycline, resulting in a weakened ability to block protein translation [36], there have been no studies that demonstrate differences in FAD-dependent oxidoreductase protein expression induced by various doses of tigecycline. In our present work, the dose-response relationship between tigecycline and the mRNA level of *M949\_0459* was measured. In the absence of tigecycline, there was detectable expression of *M949\_0459*. At a 4 mg/L dose, there was a significant increase in expression, followed by a slight increase at 2 mg/L. However, when the dose of tigecycline increased from 4 mg/L to 10 mg/L, on the contrary, the *M949\_0459* gene expression was gradually decreased, and finally was expressed at an extremely low level.

In addition to FAD-dependent oxidoreductase, resistance to tigecycline in the clinic also occurs through an efflux protein-mediated mechanism in bacteria. Efflux pumps can transport a specific substrate or a range of structurally dissimilar compounds. The latter efflux pumps are related to multidrug (antibiotic) resistance (MDR) [37, 38]. In bacteria, five families of efflux pump proteins have been described: the ATP-binding cassette superfamily, the major facilitator superfamily (MFS), the multidrug and toxic-compound extrusion (MATE) family, the small multidrug resistance (SMR) family, and the RND family [39]. Previous studies have shown that reduced tigecycline susceptibility mainly results from the overexpression of the RND pumps, AcrAB-TolC, and MATE pumps in different bacteria [40]. This led us to assess efflux pumps as an alternative tigecycline resistance mechanism in the current study. In our present work, two broad-spectrum EPIs, CCCP and PA $\beta$ N, were used to identify the phenotype of active efflux systems. The results indicated that these two EPIs did not affect the susceptibility to tigecycline. Li *et al.* described the effect of CCCP and PA $\beta$ N on the MIC of ten antibiotic agents against 66 strains of *R. anatipestifer* clinic isolates. They found that these two EPIs restored susceptibility of *R. anatipestifer* isolates to tetracycline [41]. Nevertheless, they did not examine the effect of these two EPIs on the susceptibility of *R. anatipestifer* isolates to tigecycline. It is possible that, different from tetracycline, tigecycline has a lower affinity for specific efflux pumps [42]. It is also possible that tigecycline cannot be expelled by MFS efflux

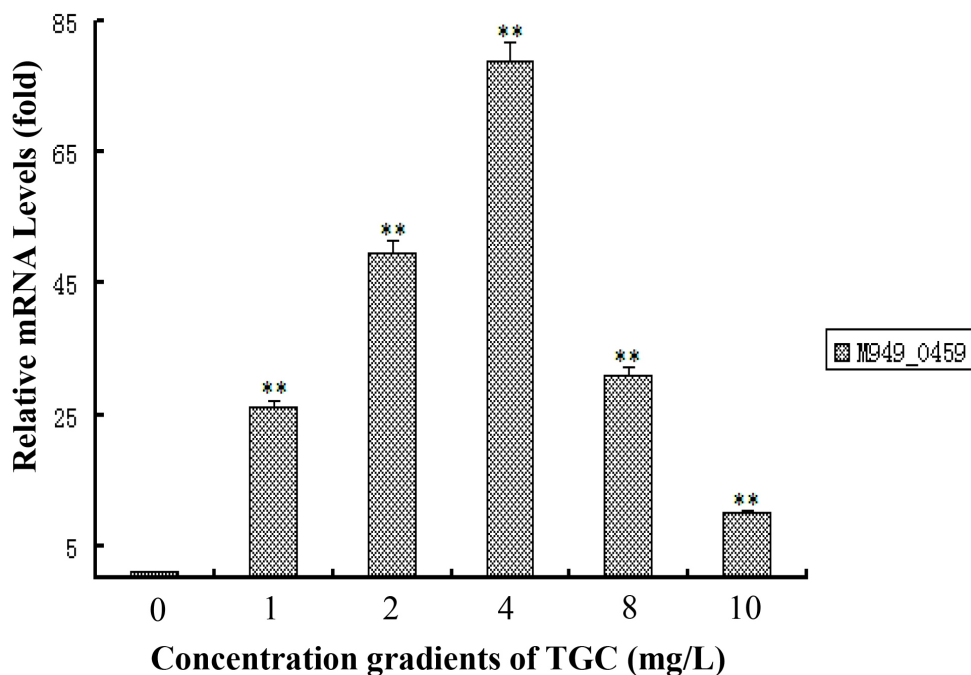

**Figure 7: Tigecycline treatment changed the expression of *M949\_0459* gene.** The expression of the *M949\_0459* gene following treatment with different concentrations of tigecycline was measured by quantitative real-time PCR. Error bars represent standard deviations from three replicates. \*\* $p < 0.01$ .



pumps in either Gram-negative or Gram-positive bacteria [42]. Alternatively, it may be that different kinds of EPis interfere with efflux pump activity through different modes of action [43]. Currently, no reports about MDR pumps in *R. anatipestifer* have been published, although genome analysis data has indicated that hypothetical MDR efflux pumps, such as those belonging to the MFS and SMR families, exist in *R. anatipestifer* [10, 44, 45]. Further research seeking specific resistance pumps playing important roles in extruding antimicrobial agents in *R. anatipestifer* is needed.

It is intriguing that the amino acid sequence deduced by *M949\_0459* shares 91% sequence identity with the TetX2 protein (*B. fragilis* str. S23L17). Yang *et al.* first demonstrated that TetX2 belongs to a family of FAD-requiring monooxygenases that inactivate a broad selection of tetracycline antibiotics through reductive electron transfer or hydroxylation reactions [46]. Recently, Walkiewicz evaluated the potential of TetX tetracycline resistance proteins to acquire mutations causing tigecycline resistance. They found that among TetX mutants showing higher resistance levels to tigecycline, more than half contained the amino acid substitution as a single mutation or in combination with other changes at position 280. Furthermore, assessing the fitness of *E. coli* containing one copy of either wild-type TetX2 or variants of TetX2 amino acid substitution with a range of minocycline concentrations, the amino acid substitution T280A/T280S, and N371I/N371T were successful in the bacterial drug adaptation experiment [47, 48]. In this study, a comparison of the sequences from *M949\_0459* and the other selected TetX sequences showed that the spontaneous amino acid substitution is present in *M949\_0459* at position 280 and 371 (Figure 3A).

In summary, we identified that *R. anatipestifer M949\_0459* gene is responsible for the bacterial resistance to tigecycline, which may provide insights into molecular mechanisms for chemotherapy in combating *R. anatipestifer* infections.

## MATERIALS AND METHODS

### Bacterial strains, plasmids, and media

The bacterial strains and plasmids used in this study are listed in Table 1. *R. anatipestifer* wild-type strain CH3 and the mutant strain CH3Δ*M949\_0459* were used. The mutant strain CH3Δ*M949\_0459* was screened out from a random transposon mutant library that was previously constructed in our laboratory [16] using the tigecycline MIC assay. *R. anatipestifer* strains were grown in broth microdilutions according to the Clinical and Laboratory Standards Institute (CLSI) at 37°C. *E. coli* strains were grown at 37°C on Luria-Bertani (LB)

plates or in LB broth. When necessary, the medium was supplemented with appropriate antibiotics at the following concentrations: ampicillin (100 mg/L), chloramphenicol (30 mg/L), erythromycin (0.5 mg/L), kanamycin (50 mg/L), and cefoxitin (5 mg/L).

### Antimicrobial susceptibility test

The MIC value of tigecycline was determined by serial dilution in 96-well culture plates, with these being performed according to the guide published by the CLSI in 2015. Other antimicrobial drug susceptibility tests were tested by the Kirby Bauer disc diffusion method according to CLSI guidelines in 2015.

### Identification of the mutant strain

The transposon insertion site in the mutant strain was determined with genome walking, which was performed with a genome walking kit (TaKaRa, Dalian, China) using four random primers (AP1, AP2, AP3, and AP4) provided in the kit and three specific primers (SP1, SP2, and SP3), according to the manufacturer's instructions. The PCR-amplified gene was inserted into T-vector pMD19 (TaKaRa) for DNA sequencing (Shanghai HuaGene Biotech, Shanghai, China). The identified gene sequence was searched for homologous sequences on the BLAST server (<http://blast.st-va.ncbi.nlm.nih.gov/Blast.cgi>).

### Bioinformatics analysis

The COGNITOR software (<http://www.ncbi.nlm.nih.gov/COG/old/xognitor.html>) was used to assess putative functions of the gene. The homologous protein sequences were searched using the BLASTX server (<http://www.ncbi.nlm.nih.gov/BLASTX/>) and aligned using CLUSTAL Omega [17].

### Quantitative real-time PCR analysis

Quantitative real-time PCR (qRT-PCR) was performed to measure the expression levels of the transposon-disrupted and flanking genes in wild-type strain CH3 and mutant strain, as well as the *M949\_0459* gene following treatment with different doses of tigecycline at the transcriptional level. Total RNA of the samples was extracted with TRIzol reagent (Invitrogen, Carlsbad, CA, USA) according to the manufacturer's instructions. To avoid DNA contamination, the extracted RNA was treated with RNase-free DNase I (40 U/mg RNA, TaKaRa) and purified using the RNeasy Mini Kit (Qiagen, Hilden, Germany) according to the manufacturer's instructions. cDNA was synthesized using the GoTaq qPCR Master Mix Kit (Promega, Madison, WI, USA) following the

manufacturer's instructions after adjusting the samples to the same concentration. qRT-PCR was performed with the ABI7500 Real-Time PCR System (Applied Biosystems, Foster City, CA, USA). Gene-specific primers were designed using the primer3 online software v.0.4.0 (<http://bioinfo.ut.ee/primer3-0.4.0/>) and are described in Table 1. The expression of 16S rRNA was used as an internal control. The specificity of amplification was confirmed using melting curve and electrophoresis analysis. The data were analyzed with the normalized gene expression method ( $2^{-\Delta\Delta CT}$ ) [18]. Each reaction was performed in triplicate, and the entire experiment was carried out in triplicate.

### alamarBlue assay

The metabolic activity of the strains was measured using the alamarBlue reagent (Thermo Fisher, Waltham, MA, USA), according to the manufacturer's protocol. In brief, 20  $\mu$ L of the alamarBlue reagent was directly added to 200  $\mu$ L of the bacterial culture medium and blank medium (negative control); then, these were incubated for 1 h at 37°C while protected from direct light. Next, the absorbance of alamarBlue was monitored at 570 nm, using 600 nm as a reference wavelength (normalized to the 600nm value). The proliferation rate ( $r$ ) was calculated according to the following formula:  $[(117, 216 \times A_{570}(\text{sample}) - 80, 856 \times A_{600}(\text{sample})) / (117, 216 \times A_{570}(\text{control}) - 80, 856 \times A_{600}(\text{control}))] \times 100\%$ .

### Construction and transformation of the Pet-28a(+)-M949\_0459 plasmid

The DNA fragment carrying the *M949\_0459* gene was amplified from the *R. anatipestifer* strain CH3 using the primers listed in Table 1. After amplification, the amplicon was cloned into the expression vector Pet-28a(+) to construct Pet-28a(+)-M949\_0459 plasmid, and *E. coli* strain BL21 was subsequently used for transformation. Using Luria-Bertani agar (Difco, Detroit, MI, USA) containing kanamycin (50 mg/L), the transformants were selected and sequenced. The confirmed transformants were subjected to tigecycline susceptibility testing. *E. coli* BL21 with Pet-28a(+) vector without the DNA insertion was used as a control.

### Efflux pump inhibition assay

An efflux pump inhibition assay was performed as described previously [19]: broth microdilution testing of tigecycline was performed with and without phenylalanine arginine  $\beta$ -naphthylamide (PA $\beta$ N) (40 mg/L) and carbonyl cyanide *m*-chlorophenyl hydrazone (CCCP) (3 mg/L).

### Statistical analysis

Statistical analysis was performed with Student's *t* test. Mean values are shown in the figures. Statistical significance was established at  $p < 0.05$ .

### Author contributions

TL and SY planned the experiments. TL, MS and JH conducted the experiments. TL, XW, SW, MT, JQ, YS, TL, CD, and SY analyzed and discussed the experimental results. TL and SY wrote the manuscript.

### CONFLICTS OF INTEREST

The authors declare that the research was conducted in the absence of any commercial or financial relationships that could be construed as a potential conflict of interest.

### FUNDING

This work was supported by the National Key R & D Program (2016YFD0500805), the Shanghai Key Project on Agricultural Development through Science and Technology (2016HNG4-1) and Co-innovation of Science and Technology Innovation Project in Chinese Academy of Agricultural Sciences (CAAS-XTCX2016011-04-8).

### REFERENCES

1. Petersen PJ, Jacobus NV, Weiss WJ, Sum PE, Testa RT. In vitro and in vivo antibacterial activities of a novel glycylicycline, the 9-t-butylglycylamido derivative of minocycline (GAR-936). *Antimicrob Agents Chemother.* 1999; 43: 738-744.
2. Sum PE, Petersen P. Synthesis and structure-activity relationship of novel glycylicycline derivatives leading to the discovery of GAR-936. *Bioorg Med Chem Lett.* 1999; 9: 1459-1462.
3. French GL. A review of tigecycline. *J Chemother.* 2008; 20: 3-11.
4. Nowak J, Seifert H, Higgins PG. Prevalence of eight resistance-nodulation-division efflux pump genes in epidemiologically characterized *Acinetobacter baumannii* of worldwide origin. *J Med Microbiol.* 2015; 64: 630-635.
5. McQueary CN, Kirkup BC, Si Y, Barlow M, Actis LA, Craft DW, Zurawski DV. Extracellular stress and lipopolysaccharide modulate *Acinetobacter baumannii* surface-associated motility. *J Microbiol.* 2012; 50: 434-443.
6. Worthington RJ, Richards JJ, Melander C. Small molecule control of bacterial biofilms. *Org Biomol Chem.* 2012; 10: 7457-7474.
7. Li X, Liu L, Ji J, Chen Q, Hua X, Jiang Y, Feng Y, Yu

- Y. Tigecycline resistance in *Acinetobacter baumannii* mediated by frameshift mutation in *plsC*, encoding 1-acyl-sn-glycerol-3-phosphate acyltransferase. *Eur J Clin Microbiol Infect Dis*. 2015; 34: 625-631.
8. Segers P, Mannheim W, Vancanneyt M, De Brandt K, Hinz KH, Kersters K, Vandamme P. *Riemerella anatipestifer* gen. nov., comb. nov., the causative agent of septicemia anserum exsudativa, and its phylogenetic affiliation within the *Flavobacterium-Cytophaga* rRNA homology group. *Int J Syst Bacteriol*. 1993; 43: 768-776.
  9. Sun N, Liu JH, Yang F, Lin DC, Li GH, Chen ZL, Zeng ZL. Molecular characterization of the antimicrobial resistance of *Riemerella anatipestifer* isolated from ducks. *Vet Microbiol*. 2012; 158: 376-383.
  10. Luo H, Liu M, Wang L, Zhou W, Wang M, Cheng A, Jia R, Chen S, Sun K, Yang Q, Chen X, Zhu D. Identification of ribosomal RNA methyltransferase gene *ermF* in *Riemerella anatipestifer*. *Avian Pathol*. 2015; 44: 162-168.
  11. Chen YP, Tsao MY, Lee SH, Chou CH, Tsai HJ. Prevalence and molecular characterization of chloramphenicol resistance in *Riemerella anatipestifer* isolated from ducks and geese in Taiwan. *Avian Pathol*. 2010; 39: 333-338.
  12. Chen YP, Lee SH, Chou CH, Tsai HJ. Detection of florfenicol resistance genes in *Riemerella anatipestifer* isolated from ducks and geese. *Vet Microbiol*. 2012; 154: 325-331.
  13. Yuan J, Liu W, Sun M, Song S, Cai J, Hu S. Complete genome sequence of the pathogenic bacterium *Riemerella anatipestifer* strain RA-GD. *J Bacteriol*. 2011; 193: 2896-2897.
  14. Gao M, Jia R, Qiu T, Han M, Wang X. Size-related bacterial diversity and tetracycline resistance gene abundance in the air of concentrated poultry feeding operations. *Environ Pollut*. 2017; 220: 1342-1348.
  15. Zhang P, Shen Z, Zhang C, Song L, Wang B, Shang J, Yue X, Qu Z, Li X, Wu L, Zheng Y, Aditya A, Wang Y, et al. Surveillance of antimicrobial resistance among *Escherichia coli* from chicken and swine, China, 2008-2015. *Vet Microbiol*. 2017; 203: 49-55.
  16. Hu Q, Zhu Y, Tu J, Yin Y, Wang X, Han X, Ding C, Zhang B, Yu S. Identification of the genes involved in *Riemerella anatipestifer* biofilm formation by random transposon mutagenesis. *PLoS One*. 2012; 7: e39805.
  17. Sievers F, Wilm A, Dineen D, Gibson TJ, Karplus K, Li WZ, Lopez R, McWilliam H, Remmert M, Soding J, Thompson JD, Higgins DG. Fast, scalable generation of high-quality protein multiple sequence alignments using Clustal Omega. *Mol Syst Biol*. 2011; 7:539.
  18. Livak KJ, Schmittgen TD. Analysis of relative gene expression data using real-time quantitative PCR and the 2(-Delta Delta C(T)) Method. *Methods*. 2001; 25: 402-408.
  19. Valdezate S, Vindel A, Echeita A, Baquero F, Canto R. Topoisomerase II and IV quinolone resistance-determining regions in *Stenotrophomonas maltophilia* clinical isolates with different levels of quinolone susceptibility. *Antimicrob Agents Chemother*. 2002; 46: 665-671.
  20. Fu JF, Tseng YH. Construction of lactose-utilizing *Xanthomonas campestris* and production of xanthan gum from whey. *Appl Environ Microbiol*. 1990; 56: 919-923.
  21. Lemire BD. Evolution of FOXRED1, an FAD-dependent oxidoreductase necessary for NADH:ubiquinone oxidoreductase (Complex I) assembly. *Biochim Biophys Acta*. 2015; 1847: 451-457.
  22. Speer BS, Salyers AA. Characterization of a novel tetracycline resistance that functions only in aerobically grown *Escherichia coli*. *J Bacteriol*. 1988; 170: 1423-1429.
  23. Thaker M, Spanogiannopoulos P, Wright GD. The tetracycline resistome. *Cell Mol Life Sci*. 2010; 67: 419-431.
  24. Brotz-Oesterhelt H, Brunner NA. How many modes of action should an antibiotic have? *Current Opinion in Pharmacology*. 2008; 8: 564-573.
  25. Olson MW, Ruzin A, Feyfant E, Rush TS 3rd, O'Connell J, Bradford PA. Functional, biophysical, and structural bases for antibacterial activity of tigecycline. *Antimicrob Agents Chemother*. 2016: 2156-2166.
  26. Ruzin A, Visalli MA, Keeney D, Bradford PA. Influence of transcriptional activator RamA on expression of multidrug efflux pump AcrAB and tigecycline susceptibility in *Klebsiella pneumoniae*. *Antimicrob Agents Chemother*. 2005; 49: 1017-1022.
  27. Visalli MA, Murphy E, Projan SJ, Bradford PA. AcrAB multidrug efflux pump is associated with reduced levels of susceptibility to tigecycline (GAR-936) in *Proteus mirabilis*. *Antimicrob Agents Chemother*. 2003; 47: 665-669.
  28. Keeney D, Ruzin A, McAleese F, Murphy E, Bradford PA. MarA-mediated overexpression of the AcrAB efflux pump results in decreased susceptibility to tigecycline in *Escherichia coli*. *J Antimicrob Chemother*. 2008; 61: 46-53.
  29. Salvatore CM, Techasaensiri C, Tagliabue C, Katz K, Leos N, Gomez AM, McCracken GH, Hardy RD. Tigecycline therapy significantly reduces the concentrations of inflammatory pulmonary cytokines and chemokines in a murine model of *Mycoplasma pneumoniae* pneumonia. *Antimicrob Agents Chemother*. 2009; 53: 1546-1551.
  30. Phillips I, Casewell M, Cox T, De Groot B, Friis C, Jones R, Nightingale C, Preston R, Waddell J. Does the use of antibiotics in food animals pose a risk to human health? A critical review of published data. *J Antimicrob Chemother*. 2004; 53: 28-52.
  31. Silbergeld EK, Graham J, Price LB. Industrial food animal production, antimicrobial resistance, and human health. *Annu Rev Public Health*. 2008; 29: 151-169.
  32. Qin N, Tan X, Jiao Y, Liu L, Zhao W, Yang S, Jia A. RNA-Seq-based transcriptome analysis of methicillin-resistant *Staphylococcus aureus* biofilm inhibition by ursolic acid and resveratrol. *Sci Rep*. 2014; 4: 5467.
  33. Munita JM, Arias CA. Mechanisms of Antibiotic

- Resistance. *Microbiol Spectr.* 2016; 4.
34. Rimler Sa. (1997). *Diseases of poultry.* (IA: Iowa State University Press Ames).
  35. Yang WR, Moore IF, Koteva KP, Bareich DC, Hughes DW, Wright GD. TetX is a flavin-dependent monooxygenase conferring resistance to tetracycline antibiotics. *Journal of Biological Chemistry.* 2004; 279: 52346-52352.
  36. Leelarasamee A. Antibiotics for Resistant Bacteria. *Siriraj Med J.* 2005; 57: 450-453.
  37. Piddock LJV. Multidrug-resistance efflux pumps - not just for resistance. *Nature Reviews Microbiology.* 2006; 4: 629-636.
  38. Tan X, Qin N, Wu C, Sheng J, Yang R, Zheng B, Ma Z, Liu L, Peng X, Jia A. Transcriptome analysis of the biofilm formed by methicillin-susceptible *Staphylococcus aureus*. *Sci Rep.* 2015; 5: 11997.
  39. Collu F, Cascella M. Multidrug resistance and efflux pumps: insights from molecular dynamics simulations. *Curr Top Med Chem.* 2013; 13: 3165-3183.
  40. Zechini B, Versace I. Inhibitors of multidrug resistant efflux systems in bacteria. *Recent Pat Antiinfect Drug Discov.* 2009; 4: 37-50.
  41. Li YF, Jiang HX, Xiang R, Sun N, Zhang YN, Zhao LQ, Gu P, Wang LQ, Zeng ZL. Effects of two efflux pump inhibitors on the drug susceptibility of *Riemerella anatipestifer* isolates from China. *Journal of Integrative Agriculture.* 2016; 15: 929-933.
  42. Blanco P, Hernando-Amado S, Reales-Calderon JA, Corona F, Lira F, Alcalde-Rico M, Bernardini A, Sanchez MB, Martinez JL. Bacterial Multidrug Efflux Pumps: Much More Than Antibiotic Resistance Determinants. *Microorganisms.* 2016; 4:14.
  43. Pages JM, Amaral L. Mechanisms of drug efflux and strategies to combat them: challenging the efflux pump of Gram-negative bacteria. *Biochim Biophys Acta.* 2009; 1794: 826-833.
  44. Wang X, Ding C, Wang S, Han X, Yu S. Whole-Genome Sequence Analysis and Genome-Wide Virulence Gene Identification of *Riemerella anatipestifer* Strain Yb2. *Appl Environ Microbiol.* 2015; 81: 5093-5102.
  45. Wang X, Zhu D, Wang M, Cheng A, Jia R, Zhou Y, Chen Z, Luo Q, Liu F, Wang Y, Chen XY. Complete genome sequence of *Riemerella anatipestifer* reference strain. *J Bacteriol.* 2012; 194: 3270-3271.
  46. Yang W, Moore IF, Koteva KP, Bareich DC, Hughes DW, Wright GD. TetX is a flavin-dependent monooxygenase conferring resistance to tetracycline antibiotics. *J Biol Chem.* 2004; 279: 52346-52352.
  47. Walkiewicz K, Benitez Cardenas AS, Sun C, Bacorn C, Saxer G, Shamoo Y. Small changes in enzyme function can lead to surprisingly large fitness effects during adaptive evolution of antibiotic resistance. *Proc Natl Acad Sci U S A.* 2012; 109: 21408-21413.
  48. Walkiewicz K. Experimental evolution of TetX2: Correlating changes in fitness to their structural and functional origins. 2012; PhD Diss., Rice University.
  49. Wang X, Ding C, Han X, Wang S, Yue J, Hou W, Cao S, Zou J, Yu S. Complete Genome Sequence of *Riemerella anatipestifer* Serotype 1 Strain CH3. *Genome Announc.* 2015; 3: e01594-14.
  50. Chung YT, Hsu W. Functional expression of the bovine herpesvirus 1 alkaline deoxyribonuclease (UL12) in *Escherichia coli*. *Arch Virol.* 1996; 141: 2457-2464.
